# Supplementary material
Source: PubMed Central journal article supplement (PMC6086148)
Supplement: tpmd170473.SD1.pdf [file tpmd170473.SD1.pdf]

Supplemental Table 1  
The number of patients and controls from the two parental studies

|                                | Total | Rwanda | Zanzibar |
|--------------------------------|-------|--------|----------|
| Patients                       | 994   | 829    | 165      |
| Healthy controls               | 324   | 159    | 165      |
| One pathogen detected          |       |        |          |
| Patients                       | 26%   | 28%    | 18%      |
| Healthy controls               | 25%   | 22%    | 27%      |
| Two or more pathogens detected |       |        |          |
| Patients                       | 65%   | 63%    | 76%      |
| Healthy controls               | 58%   | 57%    | 60%      |
| Mean age (month)               |       |        |          |
| Patients                       | 13.5  | 14.3   | 12.0     |
| Healthy control                | 23.8  | 23.6   | 24.0     |

Supplemental Table 2  
Enteric coinfections in healthy controls and patients

|                                   | Adenovirus | Astrovirus     | NoV GI                  | NoV GII        | Rotavirus              | Sapovirus                   | Cryptosporidium             | Campylobacter    | ETEC-eitB              | ETEC-estA                    | EPEC-bfpA                   | EPEC-eae                    | Salmonella              | Shigella               |
|-----------------------------------|------------|----------------|-------------------------|----------------|------------------------|-----------------------------|-----------------------------|------------------|------------------------|------------------------------|-----------------------------|-----------------------------|-------------------------|------------------------|
| <b>Healthy controls (n = 324)</b> | n = 120    | n = 4          | n = 13                  | n = 11         | n = 6                  | n = 25                      | n = 84                      | n = 23           | n = 130                | n = 55                       | n = 13                      | n = 47                      | n = 21                  | n = 72                 |
| Adenovirus                        |            | 2; 1.71; 0.63  | <b>10; 6.10; 0.0056</b> | 4; 0.97; 1.0   | 2; 0.85; 1.0           | <b>16; 3.34; 0.0049</b>     | 35; 1.30; 0.36              | 10; 1.34; 0.51   | 56; 1.54; 0.079        | 25; 1.53; 0.17               | <b>9; 3.41; 0.075</b>       | <b>29; 3.14; 0.0015</b>     | 8; 1.05; 1.0            | 32; 1.49; 0.17         |
| Astrovirus                        | n = 4      |                | 1; 8.56; 0.15           | 0; 0; 1.0      | 1; 21; 0.072           | 1; 4.11; 0.28               | 2; 2.90; 0.28               | 0; 0; 1.0        | 2; 1.50; 1.0           | 0; 0; 0.59                   | 0; 0; 1.0                   | 1; 1.20; 1.0                | 1; 5.00; 0.24           | 1; 1.17; 1.0           |
| NoV GI                            | n = 13     |                |                         |                | 0; 0; 1.0              | 1; 1.00; 1.0                | 4; 1.28; 0.75               | 0; 0; 0.61       | 8; 2.48; 0.15          | 2; 0.89; 1.0                 | 3; 4.57; 0.061              | 4; 1.21; 0.75               | 1; 1.21; 0.59           | 1; 0.28; 0.31          |
| NoV GII                           | n = 11     |                |                         |                |                        | 1; 1.20; 0.59               | 2; 0.63; 0.74               | 0; 0; 1.0        | 4; 0.84; 1.0           | 2; 1.09; 1.0                 | 0; 0; 1.0                   | 0; 0; 0.11                  | 0; 0; 1.0               | 3; 1.34; 0.72          |
| Rotavirus                         | n = 6      |                |                         |                |                        | 0; 0; 1.0                   | 0; 0; 0.34                  | 0; 0; 1.0        | 3; 1.50; 0.69          | 1; 0.98; 1.0                 | 0; 0; 1.0                   | 0; 0; 0.56                  | 0; 0; 1.0               | 1; 0.70; 1.0           |
| Sapovirus                         | n = 25     |                |                         |                |                        |                             | 6; 0.91; 1.0                | 0; 0; 0.24       | <b>16; 2.93; 0.018</b> | <b>10; 3.81; 0.0035</b>      | 2; 1.51; 0.64               | 8; 2.15; 0.17               | 3; 2.15; 0.21           | 6; 1.13; 0.80          |
| Cryptosporidium                   | n = 84     |                |                         |                |                        |                             |                             | 7; 1.21; 0.64    | 38; 1.36; 0.25         | 15; 1.10; 0.74               | 1; 0.34; 0.47               | 11; 1.54; 0.37              | 3; 0.46; 0.30           | <b>27; 2.08; 0.014</b> |
| Campylobacter                     | n = 23     |                |                         |                |                        |                             |                             |                  | 9; 0.90; 1.0           | 3; 0.69; 0.78                | 1; 2.4; 0.40                | 1; 0.48; 0.67               | 1; 0.62; 1.0            | 5; 0.93; 1.0           |
| ETEC-eitB                         | n = 130    |                |                         |                |                        |                             |                             |                  |                        |                              | <b>41; 6.02; &lt;0.0001</b> | 5; 1.28; 0.76               | <b>22; 2.28; 0.027</b>  | 11; 1.73; 0.26         |
| ETEC-estA                         | n = 55     |                |                         |                |                        |                             |                             |                  |                        |                              |                             |                             | 6; 1.54; 0.56           | 1; 0.23; 0.22          |
| EPEC-bfpA (n = 159)               | n = 13     |                |                         |                |                        |                             |                             |                  |                        |                              |                             |                             |                         |                        |
| EPEC-eae (n = 159)                | n = 47     |                |                         |                |                        |                             |                             |                  |                        |                              |                             |                             |                         |                        |
| Salmonella                        | n = 21     |                |                         |                |                        |                             |                             |                  |                        |                              |                             |                             |                         |                        |
| Shigella                          | n = 72     |                |                         |                |                        |                             |                             |                  |                        |                              |                             |                             |                         |                        |
| <b>Patients (n = 994)</b>         | n = 235    | n = 35         | n = 18                  | n = 109        | n = 295                | n = 47                      | n = 193                     | n = 118          | n = 327                | n = 192                      | n = 125                     | n = 214                     | n = 67                  | n = 209                |
| Adenovirus                        |            | 8; 0.84; 0.83  |                         |                |                        |                             |                             |                  |                        |                              |                             |                             |                         |                        |
| Astrovirus                        | n = 35     |                |                         |                |                        |                             |                             |                  |                        |                              |                             |                             |                         |                        |
| NoV GI                            | n = 18     |                | 5; 1.51; 0.53           | 1; 1.63; 0.48  |                        |                             |                             |                  |                        |                              |                             |                             |                         |                        |
| NoV GII                           | n = 109    |                | 30; 1.17; 0.53          | 4; 1.05; 0.79  | 1; 0.47; 0.71          |                             |                             |                  |                        |                              |                             |                             |                         |                        |
| Rotavirus                         | n = 295    | 70; 0.93; 0.72 | 10; 0.95; 1.0           | 6; 1.19; 0.80  | 9; 0.19; <0.0001       |                             |                             |                  |                        |                              |                             |                             |                         |                        |
| Sapovirus                         | n = 47     | 14; 1.28; 0.58 | 3; 1.95; 0.23           | 0; 0; 1.0      | 1; 0.17; 0.852         | 9; 0.55; 0.14               |                             |                  |                        |                              |                             |                             |                         |                        |
| Cryptosporidium                   | n = 193    | 44; 0.94; 0.84 | 8; 1.24; 0.66           | 3; 0.82; 1.0   | 18; 0.80; 0.52         | 51; 0.82; 0.29              | 14; 1.82; 0.087             |                  |                        |                              |                             |                             |                         |                        |
| Campylobacter                     | n = 118    | 20; 0.76; 0.42 | 5; 1.25; 0.60           | 0; 0; 0.15     | 10; 0.73; 0.43         | 15; 0.31; <0.0001           | 8; 1.56; 0.25               | 37; 2.11; 0.0011 |                        |                              |                             |                             |                         |                        |
| ETEC-eitB                         | n = 327    | 79; 1.13; 0.49 | <b>18; 2.24; 0.026</b>  | 8; 1.66; 0.31  | 35; 0.97; 0.91         | 83; 0.73; 0.046             | 21; 1.70; 0.081             | 73; 1.32; 0.10   | 56; 2.03; 0.0005       |                              |                             |                             |                         |                        |
| ETEC-estA                         | n = 192    | 49; 0.97; 0.92 | 9; 1.47; 0.38           | 4; 1.20; 0.76  | 19; 0.87; 0.70         | 59; 1.06; 0.73              | <b>21; 3.67; &lt;0.0001</b> | 35; 0.90; 0.69   | <b>32; 1.67; 0.026</b> | <b>112; 3.85; &lt;0.0001</b> |                             |                             |                         |                        |
| EPEC-bfpA (n = 493)               | n = 125    | 18; 0.80; 0.55 | 4; 0.83; 1.0            | 5; 2.40; 0.16  | 16; 1.58; 0.11         | 33; 0.67; 0.065             | 4; 0.77; 0.81               | 27; 1.52; 0.088  | 13; 1.34; 0.38         | 45; 1.33; 0.17               | 18; 0.83; 0.60              |                             |                         |                        |
| EPEC-eae (n = 493)                | n = 214    | 46; 1.15; 0.58 | 10; 1.39; 0.41          | 8; 2.61; 0.052 | <b>28; 1.78; 0.027</b> | <b>58; 0.59; 0.0025</b>     | 6; 0.63; 0.42               | 32; 0.87; 0.59   | 21; 1.29; 0.39         | 74; 1.28; 0.17               | 30; 0.76; 0.29              | <b>75; 6.09; &lt;0.0001</b> |                         |                        |
| Salmonella                        | n = 67     | 17; 1.49; 0.30 | 3; 1.31; 0.73           | 2; 1.75; 0.34  | 7; 0.94; 1.0           | 22; 1.17; 0.58              | 2; 0.60; 0.76               | 13; 1.0; 1.0     | 5; 0.58; 0.33          | <b>31; 1.84; 0.021</b>       | 7; 0.46; 0.056              | 12; 1.51; 0.25              | 17; 1.21; 0.53          |                        |
| Shigella                          | n = 209    | 47; 1.07; 0.76 | 2; 0.22; 0.020          | 3; 0.75; 0.78  | 16; 0.62; 0.10         | <b>23; 0.23; &lt;0.0001</b> | <b>16; 2.01; 0.041</b>      | 45; 1.18; 0.38   | 27; 1.13; 0.63         | 76; 1.22; 0.22               | 42; 1.06; 0.77              | <b>34; 1.86; 0.0081</b>     | <b>59; 2.14; 0.0001</b> | 17; 1.30; 0.35         |

EPEC = enteropathogenic *E. coli*; ETEC = enterotoxigenic *E. coli*; GI = genotype I; GII = genotype II. For each combination, frequency, odds ratio (OR), and *P* value are given. Bolding indicates the combinations with a *P* value below 0.05 and an OR above 1. Shaded cells indicate combinations with a *P* value below 0.05 and an OR below 1.

Supplemental Table 3  
Frequencies and Ct values for real-time polymerase chain reaction detection of pathogens in feces from patients and controls

|                 | Number detected |          |             |                    | Ct value |          |                    |
|-----------------|-----------------|----------|-------------|--------------------|----------|----------|--------------------|
|                 | Patients        | Controls | OR          | <i>P</i> value     | Patients | Controls | <i>P</i> value     |
| Adenovirus      | 235             | 120      | 0.94        | 0.67               | 36.7     | 38.2     | 0.063              |
| Astrovirus      | 35              | 4        | <b>2.92</b> | <b>0.034</b>       | 25.6     | 20.5     | 0.430              |
| Norovirus GI    | 18              | 13       | 0.44        | 0.033              | 32.3     | 28.9     | 0.380              |
| Norovirus GII   | 109             | 11       | <b>3.50</b> | <b>&lt; 0.0001</b> | 27.2     | 29.4     | 0.210              |
| Rotavirus       | 295             | 6        | <b>22.3</b> | <b>&lt; 0.0001</b> | 21.8     | 26.4     | 0.130              |
| Sapovirus       | 47              | 25       | 0.59        | 0.048              | 27.6     | 26.4     | 0.390              |
| Campylobacter   | 193             | 84       | 0.69        | 0.015              | 34.2     | 37.0     | <b>0.007</b>       |
| Cryptosporidium | 118             | 23       | <b>1.76</b> | <b>0.017</b>       | 31.1     | 33.2     | <b>0.025</b>       |
| ETEC-eitB       | 326             | 130      | 0.73        | 0.019              | 32.0     | 34.3     | <b>0.003</b>       |
| ETEC-estA       | 192             | 55       | 1.17        | 0.37               | 29.9     | 37.2     | <b>&lt; 0.0001</b> |
| EPEC-bfpA       | 125             | 13       | <b>1.99</b> | <b>0.024</b>       | 31.6     | 33.0     | 0.340              |
| EPEC-eae        | 214             | 47       | 0.82        | 0.33               | 34.3     | 36.0     | 0.069              |
| Salmonella      | 67              | 21       | 1.04        | 1.00               | 41.4     | 40.7     | 0.120              |
| Shigella        | 209             | 72       | 0.93        | 0.64               | 29.2     | 34.5     | <b>&lt; 0.0001</b> |

Ct = threshold cycle; EPEC = enteropathogenic *E. coli*; ETEC = enterotoxigenic *E. coli*; GI = genotype I; GII = genotype II; OR = odds ratio. Adenovirus was tested in only 658 patients and 324 controls (not in the samples from 2009 to 2010). Enteropathogenic *E. coli*-bfpA and EPEC-eae were not tested in samples from Zanzibar (165 patients and 165 controls). Bolding highlights a *P* value below 0.05 and an OR above 1 (Fisher's exact test) or a *P* value below 0.05 by Mann-Whitney *U* test (Ct values).
